# Supplementary material for: Measuring Mental Wellbeing Among Adolescents: A Systematic Review of Instruments
Source: Springer Nature journal article supplement (doi:10.1007/s10826-017-0754-0), 2017-05-06
Supplement: MOESM1 [file 12269378]

***SocIndex (EBSC0)***

1. TI mental N1 (wellness or wellbeing or well-being or toughness)

OR

AB mental N1 (wellness or wellbeing or well-being or toughness)

2. TI emotional N1 (wellbeing or well-being or wellness or health or functioning)

OR

AB emotional N1 (wellbeing or well-being or wellness or health or functioning)

3. TI psychological N1 (functioning or wellbeing or well-being or wellness or health)

OR

AB psychological N1 (functioning or wellbeing or well-being or wellness or health)

4. TI "postive affect" OR AB "positive affect"

5. TI flourishing OR AB flourishing

6. 1 or 2 or 3 or 4 or 5

7. TI ( adolescen* or youth or teen* or "young person*" or "young people" ) OR

AB ( adolescen* or youth or teen* or "young person*" or "young people" )

8. TI (tool* or instrument* or measure* or scale* or inventor* or survey* or batter*)

OR

AB ( tool* or instrument* or measure* or scale* or inventor* or survey* or batter*)

9. S6 and S7 and S8

Publication Date Limit 1998-2016

***PsycInfo (EBSCO)***

1. TI ( mental N1 (wellness or wellbeing or well-being or toughness) ) OR AB ( mental N1 (wellness or wellbeing or well-being or toughness) )

2. TI ( emotional N1 (wellbeing or well-being or wellness or health or functioning) ) OR AB ( emotional N1 (wellbeing or well-being or wellness or health or functioning)

3. TI ( psychological N1 (functioning or wellbeing or well-being or wellness or health) ) OR AB ( psychological N1 (functioning or wellbeing or well-being or wellness or health)

4. TI "postive affect" OR AB "positive affect"

5. TI flourishing OR AB flourishing

6. 1 or 2 or 3 or 4 or 5

7. TI ( adolescen* or youth or teen* or "young person*" or "young people" ) OR AB ( adolescen* or youth or teen* or "young person*" or "young people"

8. TI (tool* or instrument* or measure* or scale* or inventor* or survey* or batter*) or AB (tool* or instrument* or measure* or scale* or inventor* or survey* or batter*) or PT (tool* or instrument* or measure* or scale* or inventor* or survey* or batter*)

9. 6 and 7 and 8

Publication Date Limit 1998-2016

***Web of Science (Thomas Reuters)***

1. TS=(“mental wellness” OR “mental well-being” OR “mental wellbeing” OR “mental toughness” OR “emotional wellness” OR “emotional well-being” OR “emotional wellbeing” OR “emotional health” OR “emotional functioning” OR “psychological wellness” OR “psychological well-being” OR “psychological wellbeing” OR “psychological health” OR “psychological functioning” OR “positive affect” OR flourishing)
2. TS=(adolescen* OR youth OR teen* OR “young person*” OR “young people”)
3. TS=( tool* OR instrument* OR measure* OR scale* OR inventor* OR survey* OR batter*)
4. 1 AND 2 AND 3

Publication date Limit: 1998-2016

***PsycTESTS (EBSCO)***

1. “Mental wellness” OR “mental well-being” OR “mental wellbeing” OR “mental toughness”
2. “emotional wellness” OR “emotional wellbeing” OR “emotional well-being” OR “emotional health” OR “emotional functioning”
3. “psychological wellness” OR “psychological well-being” OR “psychological wellbeing” OR “psychological health” OR “psychological functioning”
4. “positive affect” OR flourishing
5. 1 OR 2 OR 3 OR 4
6. Adolescen* OR youth OR teen* OR “young person*” OR “young people”
7. Tool* OR measure* OR instrument* OR scale* OR inventor* OR survey* OR batter*
8. 5 AND 6 AND 7

Publication date Limit: 1998-2016

***Cochrane Database of Systematic Reviews (Wiley)***

1. "mental wellness" or "mental well-being" or "mental wellbeing" or "mental toughness" or "emotional wellness" or "emotional well-being" or "emotional toughness" or "emotional functioning" or "emotional health" or "psychological wellness" or "psychological wellbeing" or "psychological well-being" or "psychological functioning" or "psychological health" or "positive affect" or flourishing
2. adolescen* or youth or teen* or "young people" or "young person*"
3. tool* or survey* or instrument* or measure* or inventor* or batter* or scale*
4. tool* or survey* or scale* or measure* or instrument* or batter* or inventor*:pt (Word variations have been searched)
5. #3 OR #4
6. #1 AND #2 AND #5

Publication date limit: 1998-2016

**ERIC (EBSCO)**

1. TI ( mental N1 (wellness or wellbeing or well-being or toughness) ) OR AB ( mental N1 (wellness or wellbeing or well-being or toughness)

2. TI ( emotional N1 (wellbeing or well-being or wellness or health or functioning) ) OR AB ( emotional N1 (wellbeing or well-being or wellness or health or functioning)

3. TI ( psychological N1 (functioning or wellbeing or well-being or wellness or health) ) OR AB ( psychological N1 (functioning or wellbeing or well-being or wellness or health)

4. TI "postive affect" OR AB "postive affect"

5. TI flourishing OR AB flourishing

6. 1 or 2 or 3 or 4 or 5

7. TI ( adolescen* or youth or teen* or "young person*" or "young people" ) OR AB ( adolescen* or youth or teen* or "young person*" or "young people"

8. TI ( tool* or instrument* or measure* or scale* or inventor* or survey* or batter* ) OR AB ( tool* or instrument* or measure* or scale* or inventor* or survey* or batter* ) OR PU ( tool* or instrument* or measure* or scale* or inventor* or survey* or batter*)

9 6 and 7 and 8

Publication Date Limit: 1998-2016

**Social Work Abstracts (EBSCO)**

1. TI ( mental N1 (wellness or wellbeing or well-being or toughness) ) OR AB ( mental N1 (wellness or wellbeing or well-being or toughness)

2. TI ( emotional N1 (wellbeing or well-being or wellness or health or functioning) ) OR AB ( emotional N1 (wellbeing or well-being or wellness or health or functioning)

3. TI ( psychological N1 (functioning or wellbeing or well-being or wellness or health) ) OR AB ( psychological N1 (functioning or wellbeing or well-being or wellness or health)

4. TI "postive affect" OR AB "postive affect"

5. TI flourishing OR AB flourishing

6. 1 or 2 or 3 or 4 or 5

7. TI ( adolescen* or youth or teen* or "young person*" or "young people" ) OR AB ( adolescen* or youth or teen* or "young person*" or "young people"

8. TI ( tool* or instrument* or measure* or scale* or inventor* or survey* or batter* ) OR AB ( tool* or instrument* or measure* or scale* or inventor* or survey* or batter* ) OR PT ( tool* or instrument* or measure* or scale* or inventor* or survey* or batter*)

9. 6 and 7 and 8

Publication Date Limit: 1998-2016

**CINAHL (EBSCO)**

1. TI ( mental N1 (wellness or wellbeing or well-being or toughness) ) OR AB ( mental N1 (wellness or wellbeing or well-being or toughness)

2. TI ( emotional N1 (wellbeing or well-being or wellness or health or functioning) ) OR AB ( emotional N1 (wellbeing or well-being or wellness or health or functioning)

3. TI ( psychological N1 (functioning or wellbeing or well-being or wellness or health) ) OR AB ( psychological N1 (functioning or wellbeing or well-being or wellness or health)

4. TI "postive affect" OR AB "postive affect"

5. TI flourishing OR AB flourishing

6. 1 or 2 or 3 or 4 or 5

7. TI ( adolescen* or youth or teen* or "young person*" or "young people" ) OR AB ( adolescen* or youth or teen* or "young person*" or "young people"

8. TI ( tool* or instrument* or measure* or scale* or inventor* or survey* or batter* ) OR AB ( tool* or instrument* or measure* or scale* or inventor* or survey* or batter* ) OR PT ( tool* or instrument* or measure* or scale* or inventor* or survey* or batter*)

9. 6 and 7 and 8

Publication Date Limit: 1998-2016
